---

# MICNet: PREDICTION OF ANTIBIOTIC SUSCEPTIBILITY FROM MICROSCOPIC IMAGES USING TRANSFER LEARNING

---

PREPRINT

1 Adrian Viehweger <sup>1\*</sup>, Martin Hölzer <sup>2</sup>, Christian Brandt <sup>3</sup>

2 <sup>1</sup> Institute of Medical Microbiology and Virology, University Hospital Leipzig, Leipzig, Germany <sup>2</sup> Methodology and  
3 Research Infrastructure, MF1 Bioinformatics, Robert Koch Institute, Berlin, Germany <sup>3</sup> Institute for Infectious Diseases  
4 and Infection Control, Jena University Hospital, Jena, Germany

5 \* Corresponding author: [adrian.viehweger@medizin.uni-leipzig.de](mailto:adrian.viehweger@medizin.uni-leipzig.de)

## 6 Abstract

7 Rapid susceptibility testing of bacterial isolates is crucial for anti-infective therapy, especially in critical cases such as  
8 bacteraemia and sepsis. Nevertheless, *empiric therapy* is often initiated immediately and without testing because two  
9 days and more pass between a positive blood culture and a susceptibility profile, so in the meantime, the most likely  
10 pathogens are treated. However, current empiric recommendations are very generic. They often remain unmodified  
11 even in light of incoming, early data specific to a patient's case, such as positive blood culture microscopy. Part of the  
12 hesitancy to change treatments presumably stems from a lack of systematic integration of early information beyond  
13 expert intuition. To enable targeted antimicrobial therapy earlier in a case's progression, we developed a method to  
14 predict antimicrobial susceptibility from microscopy images of bacteria alone. Our proof-of-concept MICNet combines  
15 two neural nets in a new chimerical architecture. It is pre-trained on about 100 thousand antibiograms and fine-  
16 tuned with only five thousand microscopic images through transfer learning. Predicting susceptibility profiles of four  
17 representative species, we show high predictive performance with a mean F-score of nearly 85 %. In addition, several  
18 qualitative assessments show that our chimerical net has learned substantial expert knowledge. Therefore, MICNet is  
19 the first step towards personalized empiric therapy, combining prior pathogen probabilities with patient-specific data.

20 **Keywords** Deep learning · Transfer learning · Microscopy · Minimum inhibitory concentration · Prediction

## 21 Background

22 In *empiric therapy* treatments are chosen based on the most likely pathogens expected in a particular ailment when  
23 the infectious agent is either unknown or incompletely characterized yet. Treatment suggestions are made for patient  
24 aggregates, such as "patients with suspected bacteraemia", but do not take individual patient characteristics into account.  
25 Of course, the clinical microbiologist will modify the treatments suggested in these guidelines on a per-case basis, but  
26 this process is often driven by intuition rather than explicit rules. In empiric therapy, treatment is accepted despite the

27 diagnostic uncertainty when a delay in antimicrobial treatment would lead to poor outcomes. For example, in the case  
28 of *S. aureus* bacteremia and sepsis, the odds of dying increase by 1.3 % with every hour without treatment.<sup>1</sup> Usually,  
29 there is at least some signal about what agent causes the disease. For example, bacteria can be observed in most cases  
30 once a blood culture turns positive. Under the microscope, simple features can be distinguished, such as Gram-stain,  
31 shape, and whether the growth was aerobic, anaerobic, or both. These features then lead to inference about plausible  
32 pathogens, based on which treatment is initiated.

33 A human usually performs microscopy without any algorithmic support. However, image analysis has seen an increased  
34 use of neural nets in recent years.<sup>2</sup> They have shown equal or better performance than humans on many tasks,<sup>3</sup> including  
35 in the medical realm, e.g., the classification of skin lesions<sup>4</sup> and radiographs.<sup>5</sup> In addition, in microscopy, images of  
36 bacterial culture isolates have been assigned a species name with surprising accuracy.<sup>6</sup> However, such species prediction  
37 is only of intermediate interest and arguably could be omitted. We often care about inferred properties of the organism,  
38 such as antimicrobial susceptibility, not its name, which only suggests those properties. Recently, MALDI-TOF  
39 spectra, now common practice to assign species, have been used to predict antimicrobial susceptibility using a range of  
40 algorithms from neural nets and random forests to support vector machines.<sup>7</sup> Antibigram prediction from genomes has  
41 also been shown in what is known as genotype-phenotype mapping.<sup>8,9</sup> To our knowledge, microscopic images have not  
42 been used to predict bacterial properties, although they are far cheaper to obtain than either spectra or genomes as a  
43 diagnostic modality.

44 We hypothesized that a neural net could extract more information from microscopic images than microbiologists.  
45 Subsequently, this information could be used to predict *wild-type* (wt) antimicrobial susceptibility directly. "Wild-type"  
46 refers to the expected susceptibility of an organism to different antimicrobials ("antibiogram"), and "susceptible" is  
47 defined as a measured minimum-inhibitory concentration (MIC) below some threshold, here so called "breakpoints"  
48 defined by the *European Committee on Antimicrobial Susceptibility Testing* (EUCAST, see methods). We do not try  
49 to infer resistance at the isolate level, e.g., linking single nucleotide variants to a phenotype. Instead, we aimed to  
50 teach a neural net "expert knowledge" from scratch. First, it should recognize different bacterial entities as data-driven  
51 latent representations ("embeddings"), not human-defined species. It should do so from a cheap, early diagnostic  
52 modality (here images). Then, the neural net should directly link them to expected feature distributions (here MICs).  
53 We propose a chimerical model that can do this with high accuracy using transfer learning and that can, in principle,  
54 be easily extended to include other diagnostic modalities. Our proof-of-principle opens the way for patient-specific,  
55 "personalized" empiric therapy.

## 56 **Results**

### 57 **Unsupervised antibiogram embeddings have plausible global structure**

58 First, we trained a model to "know" about wild-type antibiograms for commonly isolated human pathogens. We had  
59 access to an extensive corpus of about 100 thousand antibiograms. For training, we thus selected an unsupervised  
60 model, namely a variational autoencoder (VAE).<sup>10</sup> A significant advantage of the VAE is that it is generative, i.e., once  
61 the model has been learned, instances can be simulated from it given a prompt. A VAE represents the input  $x$  in a

62 constrained latent space ("information bottleneck") where each instance of  $x$  has a low-dimensional representation  $z$   
63 (Figure 1A).

64 Training with about 100 thousand MIC profiles ( $x$ ) of 26 antibiotics each resulted in a plausible distribution across  
65 latent space. Across all species, antibiogram representations ( $z$ ) of the same species cluster together, similar species are  
66 closer than more distant ones (compare *Pr. vulgaris* and *mirabilis*), and Gram-negative and -positive MICs are well  
67 separated (Figure 1B and S1). Antibiograms generated from the model ( $x'$ ) are also accurate. For example, in *E. coli*,  
68 the wild-type MIC distribution is well approximated (Figure S2). Note, however, how the VAE struggles to model  
69 multi-modal or wide distributions because it uses the Gaussian distribution to model data by design (Figure S2).<sup>10</sup> The  
70 variance of the reconstructions is small for similar antibiograms (e.g. *Ent. faecalis* (ATCC 29212), Figure S1). We can  
71 assess this using technical replicates in our database (we regularly calibrate the method used to measure MIC, *broth*  
72 *micro-dilution*, using ATCC control strains with corresponding known MIC values).

73 In the latent space, global distance has meaning, as one interpolates from one point to another (see below). It means  
74 that previously unseen values can nevertheless be embedded. We illustrate this in Figure 1C where we record the  
75 imputed values for cefotaxim (CTX) moving in latent space from wild-type *E. coli* ( $\text{MIC}_{\text{CTX}} \leq 1$  mg/L) to isolates that  
76 carry an extended-spectrum beta-lactamase (ESBL), where we expect much higher  $\text{MIC}_{\text{CTX}}$  values. Indeed, we see an  
77 exponential increase in the  $\text{MIC}_{\text{CTX}}$  as we move in the latent space from a sensitive point to a resistant one (arrow in  
78 Figure 1C). The same is true for e.g. colistin (COL) when moving from *E. coli* to *Pr. mirabilis* (not shown).

79 Our qualitative analysis suggests that the VAE learned a plausible representation of antibiograms. However, we did  
80 not quantitatively assess the reconstruction loss other than using it as feedback in the training process (i.e., we did not  
81 evaluate the VAE on a hold-out set). The reason is that the VAE as an unsupervised algorithm is better evaluated on  
82 how well it helps another process, in our case, another neural net. For the latter, validation and test sets were held out  
83 according to standard practice (see below).

#### 84 **Microscopy images can be projected into latent susceptibility space using transfer learning**

85 With the VAE trained, we now had a model which we could prompt with two (latent) coordinates to generate an  
86 antibiogram, using only the VAE decoder. Note that the decoder is deterministic, i.e., given a coordinate  $z$ , it always  
87 returns the exact reconstruction  $x'$ . Next, we sought to project image data into the latent space to generate antibiograms  
88 from microscopy images. The inspiration for this architecture comes from the recently published DALL-E model,<sup>11</sup>  
89 which enables zero-shot text-to-image generation.

90 To test our approach in a proof-of-principle, we used an existing high-quality dataset.<sup>6</sup> To project images into the  
91 (pre-trained) VAE latent space, we used a pre-trained convolutional neural net (CNN) with the ResNet architecture.<sup>12</sup>  
92 The advantage of using two pre-trained models (VAE, CNN), or *transfer learning* more generally, is data efficiency.  
93 With them, far less data is required on domain-specific tasks because the models have already learned general features  
94 of the data and need only be "fine-tuned" on a few examples to reach good predictive performance.

95 For all subsequent experiments, we only used a subset of images from four bacterial species, two of them Gram-positive  
96 (*S. aureus*, *Ent. faecalis*) and two Gram-negative (*E. coli*, *P. aeruginosa*). We chose them because of the clinical  
97 relevance to distinguish them in blood culture. For example, Gram-negative rods can be treated empirically with

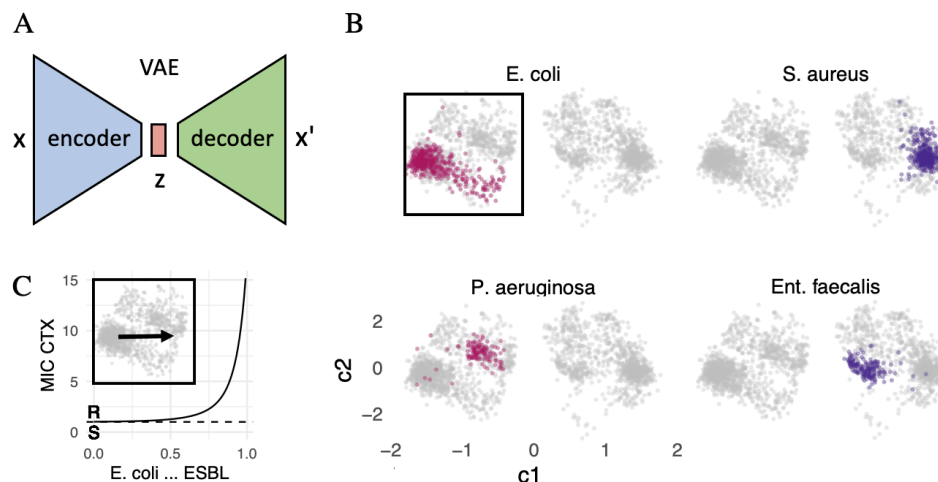

Figure 1: Overview of the two neural nets combined to predict antimicrobial susceptibility from microscopic images. (A) A Variational autoencoder (VAE) tries to reconstruct, without supervision, an antibiogram  $x'$  given the original antibiogram  $x$  from a low-dimensional "information bottleneck", a latent representation  $z$ . After training, the model is generative, and given any value for  $z$  a MIC  $x'$  can be reconstructed, independent of the encoder. (B) The VAE learns two-dimensional antibiogram embeddings. Displayed are selected Gram-negative (violet) and -positive (blue) bacterial species. Each point is a latent antibiogram representation defined by two coordinates,  $c1$  and  $c2$ . Note how, without any species labels, the model nevertheless clusters points by species in latent space. (C) In the area of latent space marked in by the black frame in (B), we interpolate along the arrow (insert), using the corresponding two coordinates in latent space  $z$  to generate an antibiogram  $x'$  from a point representing an *E. coli* wild-type (wt) isolate, to one that harbors an extended-spectrum beta-lactamase (ESBL). Focusing on cefotaxime (CTX), which ESBL inactivates, we see an exponential increase in its MIC as we move along the arrow. At 1 mg/L an isolate moves from CTX sensitive (S) to resistant (R, see breakpoints for Enterobacterales, EUCAST v11 from 2021). The x-axis displays the interpolation weight  $w$  of  $z_{ESBL}$  between 0 and 1, where  $1 - w$  is the weight of wt *E. coli* ( $z_{wt}$ ). The y-axis displays  $MIC_{CTX}$  in mg/L.

98 cefotaxime. On the other hand, *P. aeruginosa* cannot be treated with cefotaxime because it is inherently resistant to  
99 it. We assigned wild-type antibiograms from our database at random to these subset images. We then fine-tuned the  
100 ResNet, which means that we froze all weights but the final layer during training. The final layer ("head") was replaced  
101 with a fully connected layer that outputs two dimensions, compatible with the VAE latent space (Figure 2A). Thus,  
102 the neural net has to perform a multi-output regression task. After fine-tuning, the CNN generated embeddings from  
103 images that mirrored the VAE. However, a better distinction seems to be possible for the Gram-negative bacteria than  
104 for Gram-positive ones (Figure 2B).

### 105 Chimerical architecture shows good performance in susceptibility prediction task

106 We evaluated the performance of our proposed MICNet architecture in two ways: First, quantitatively, by classifying  
107 each predicted MIC value for a given antibiotic and species as correct if it fell in the right breakpoint interval (sensitive,  
108 resistant) and calculating precision, recall and the F-score for each predicted MIC profile. Our method reaches a  
109 precision of  $93.78 \pm 12.25 \%$ , a recall of  $82.20 \pm 22.32 \%$ , and a F-score of  $84.73 \pm 17.41 \%$  (Figure 2C and Figures S3  
110 and S4). Note that left-skewed distributions can lead to the phenomenon that the sum of mean and standard deviation  
111 exceeds the maximum value, here 100 %. The performance is surprisingly good, considering the network can only train  
112 on about 3,500 image-susceptibility profile pairs. This frugality illustrates the value of transfer learning whereby the

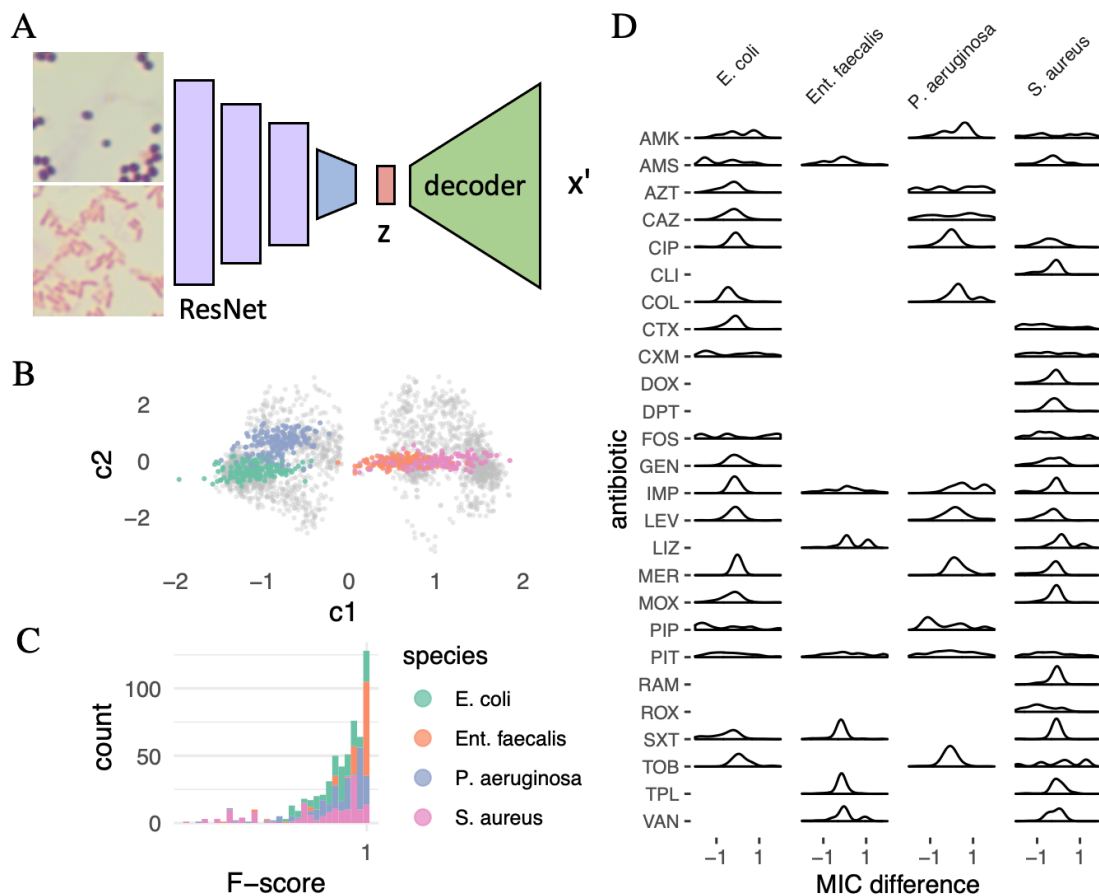

Figure 2: **(A)** Chimerical neural net for transfer learning. A pre-trained convolutional neural net (CNN) is used to encode microscopy images (ResNet architecture, only four of 18 layers are displayed). All layer weights have been frozen during "fine-tuning" (violet) except for the last, fully-connected one (blue). Images are from culture isolates of four bacterial species. Displayed is a Gram-positive photomicrograph in the upper panel and a Gram-negative one in the lower one. The final layer (blue) has been replaced to map the image representation into the latent space of the VAE in Figure 1A (multi-output regression task). The learned image representation  $z$  is then fed into the pre-trained VAE decoder to generate a MIC reconstruction  $x'$ . **(B)** Image embedding in the VAE latent space. Each point represents an image from the test set with two coordinates ( $c1$  and  $c2$ ). *E. coli* and *P. aeruginosa* can be separated well, while *S. aureus* and *E. faecalis* appear more similar to the network. **(C)** Predictive performance of the chimerical neural net in (A) is high. Evaluated to predict the right EUCAST susceptibility class, i.e., whether an isolate was sensitive or resistant, for the entire panel of 26 antibiotics, we achieve a precision of  $93.78 \pm 12.25\%$ , a recall of  $82.20 \pm 22.32\%$ , and an F-score of  $84.73 \pm 17.41\%$  across all test antibiograms ( $n = 698$ ). **(D)** Distribution of differences of MIC values between original and reconstructed antibiograms. Only antibiotics with corresponding EUCAST breakpoints for the bacterial species were included (EUCAST v11, 2021). For most antibiotics, the difference lies between -1 and 1, which is acceptable to stay within the correct susceptibility class for most substances. Antibiotic abbreviations according to the WHO.

113 neural net has acquired extensive knowledge about the problem domain through pre-training on data from a different  
 114 domain (CNN) and unlabelled data (VAE), respectively (see methods).

115 Second, for a qualitative evaluation, we plotted the distribution of MIC differences for all antibiotics with defined  
 116 EUCAST breakpoints in the corresponding species (Figure 2D). Most antibiotics fall within the  $\pm 1$  range of the true  
 117 value, which is sufficient to remain in the same susceptibility category (sensitive, resistant). However, on average, the

118 difference is larger for substances with a multimodal MIC distribution in the wild-type, such as fosfomycin (FOS).  
119 Furthermore, there are larger differences for antibiotics with a very broad MIC distribution, e.g., piperacillin (PIP,  
120 Figure 2D and S2). We address several proposed architectural changes to deal with this shortcoming in the discussion.

## 121 Discussion

122 We demonstrate how very different modalities can be linked efficiently through neural nets and transfer learning to  
123 provide personalized empirical therapy suggestions hours or days before the actual measurement of what was predicted  
124 is available.

125 Interestingly, our proposed chimeric model does not use bacterial species identity or only implicitly through the attached  
126 phenotype. We consider this a strength rather than a weakness because the species name is only relevant to predict  
127 properties of the organism that are relevant for therapy. Arguably, in clinical microbiology practice, if everything about  
128 an isolate was known but the name, not much would change. Also, whether *species* is a useful concept in microbiology  
129 remains debated.<sup>13</sup>

130 Our proposed solution is a proof of principle. We have not scoured the optimization space without prospectively  
131 collected data, i.e., blood culture microscopy images combined with MIC profiles. However, we envision several  
132 improvements in the following iterations of MICNet. First, it can incorporate other data sources available at the same  
133 time as microscopy; namely, patient metadata such as age, sex, and current diagnoses<sup>14</sup> as well as MALDI-TOF spectra  
134 of the positive blood cultures.<sup>15</sup> Such a multimodal net would be trained the same way we did here. Second, we could  
135 train the neural net "end-to-end", propagating the loss from the final generated antibiogram  $x'$  through the VAE decoder  
136 and then the CNN. Third, we could optimize both models used. For the VAE, we could use a discretized version,  
137 such as the VQ-VAE,<sup>16,17</sup> as it would model the discrete MIC dilution steps better. For the CNN, we could test other  
138 architectures such as a larger ResNet or VGG.<sup>18</sup> We used microscopy images from bacterial isolate in the current study;  
139 with positive blood culture images, image preprocessing will also have to be optimized.<sup>19</sup>

140 Furthermore, future work will have to include all bacterial and fungal species that can be observed in bacteraemia.  
141 This distribution is highly skewed, which poses a challenge for predicting rare species. However, because our model  
142 does not depend on species identification, and the rare species are usually similar to a more abundant one, we assume  
143 our model will perform well in this context.

## 144 Conclusions

145 Our approach proposes a way towards *personalized* empiric therapy, improving clinical outcomes through timely  
146 treatment suggestions and minimizing unnecessary prescriptions of antibiotics, which reduces the rate of resistance  
147 development.

## 148 **Methods**

### 149 **MIC data acquisition and preprocessing**

150 Susceptibility testing was carried out using the broth micro-dilution method per ISO 20776-1. Broth micro-dilution  
151 was performed according to the European Committee on Antimicrobial Susceptibility Testing (EUCAST). Mini-  
152 mum inhibitory concentrations (MICs) for the following antibiotics were determined: ampicillin, ampicillin/sulbactam,  
153 piperacillin, piperacillin/tazobactam, ceftazidime, cefotaxime, cefuroxime, aztreonam, imipenem, meropenem, amikacin,  
154 gentamicin, tobramycin, ciprofloxacin, levofloxacin, moxifloxacin, colistin, fosfomycin, trimethoprim/ sulfamethoxa-  
155 zole and tigecycline, clindamycin, roxithromycin, vancomycin, teicoplanin, and rifampicin. There are 24 antibiotics in  
156 each of two of the routine panels, one for Gram-positive and one for Gram-negative isolates. We merged them into a  
157 panel of 26, setting the value for substances not in the panel to 512, i.e., double the highest concentration tested, to  
158 signal "resistance" because these substances would not work due to missing targets.

### 159 **Image data preprocessing**

160 For micrographs, we relied on the previously published DIBaS dataset,<sup>6</sup> which was created from pure culture isolates  
161 of 33 different genera and species of bacteria for a total of 660 images (equal proportions) at a resolution of 2048 x  
162 1532 pixels (last access 2021-10-01, [miszta.edu.pl/software/databases/dibas](https://miszta.edu.pl/software/databases/dibas)). To augment the data, we cropped the  
163 images into non-overlapping blocks of 224 x 224 pixels, 224 because this is the smallest size compatible with a ResNet  
164 architecture (see below). This preprocessing step was also used to avoid excessive blurring due to the CNN pooling  
165 layers. Given the original images' high resolution and "wide-angle", we would lose important information about shapes  
166 and edges. The preprocessed images also mimic how a microscopist would process slides under a microscope, i.e., with  
167 smaller fields of view. In line with community standard practice and for ResNet compatibility, the images were loaded  
168 in to a range of [0, 1] and normalized in all three RGB channels to means (0.485, 0.456, 0.406) and standard deviations  
169 (0.229, 0.224, 0.225) computed from the images originally used to train ImageNet,<sup>20</sup> and which were subsequently  
170 used to pre-train our convolutional neural net (CNN, see below).

### 171 **Training, validation, and testing data**

172 From the cropped image data, we selected four species for our experiments. These are relevant pathogens where the  
173 distinction is clinically relevant when diagnosing positive blood cultures (see results). From these four species, we  
174 randomly selected 70% ( $n = 3020$ ) of cropped images as training data, and 15%, respectively, as validation ( $n = 590$ )  
175 and test ( $n = 698$ ) set. We then assigned each cropped image a wild-type MIC of the corresponding species from our  
176 database at random. Note how, while this amount of data is hard to collect in practice, it is still an order of magnitude  
177 smaller than what would be required to train the models we use from scratch. Only transfer learning using pre-trained  
178 weights allows learning from such little data.

### 179 **Variational autoencoder model**

180 We trained a variational autoencoder (VAE)<sup>10</sup> on our entire MIC dataset. Each vector of 26 numbers was forced through  
181 a two-dimensional information bottleneck ( $z$ ). We trained for 30 epochs with a mean squared error (MSE) loss, a

182 Kullback-Leibler divergence (KLD) weight of  $\beta = 1$  in line with the original implementation, optimized using Adam<sup>21</sup>  
183 with a learning rate of 0.003 and a batch size of 64.

#### 184 **Convolutional encoder-decoder model (MICNet) and transfer learning**

185 To leverage transfer learning of images, we used a pre-trained ResNet architecture with 18 layers (downloaded from  
186 `pytorch vision`, v0.10.0, [pytorch.org/hub/pytorch\\_vision\\_resnet](https://pytorch.org/hub/pytorch_vision_resnet), last access 2021-07-03). We then replaced its final  
187 layer ("head") with a fully connected layer mapping its input to a 2-dimensional vector  $\hat{y}$ , i.e., of the same shape as the  
188 embedding space of the VAE, and freezing all other weights during subsequent training ("finetuning"). The network  
189 thus performs a multi-output regression task. We trained for ten epochs with an MSE loss, optimized using stochastic  
190 gradient descent (SGD)<sup>21</sup> with a (maximum) learning rate of 0.001 and a momentum of 0.9 in a one cycle learning  
191 schedule to speed up convergence.<sup>22</sup> We used a batch size of 64.

192 For MIC predictions from images, we then fed  $\hat{y}$  to the decoder of the VAE to generate MICs deterministically (only  
193 the encoder includes a noise term). The final prediction is thus generated from a chimerical network that uses transfer  
194 learning to encode and decode the image into a MIC profile. MIC breakpoints used during the evaluation were sourced  
195 from EUCAST (v11 from 2021-01-01, [eucast.org/clinical\\_breakpoints](https://eucast.org/clinical_breakpoints)). For antibiotics where a breakpoint existed for  
196 "susceptible, increased exposure" (I), we used this breakpoint instead of "sensitive".

#### 197 **List of abbreviations**

198 MIC .. minimum inhibitory concentration, CNN .. convolutional neural network, VAE .. variational autoencoder, NN  
199 .. neural net, KLD .. Kullback-Leibler divergence, SGD .. stochastic gradient descent, ESBL .. extended-spectrum  
200 beta-lactamase, wt .. wild-type, EUCAST .. European Committee on Antimicrobial Susceptibility Testing

#### 201 **Availability of data and materials**

202 The MIC data is under restricted access and is not available for public release due to institutional regulations at the  
203 University Hospital Leipzig.

#### 204 **Competing interests**

205 AV, CB and MH are co-founders of nanozoo GmbH and hold shares in the company.

#### 206 **Funding**

207 None received.

#### 208 **Acknowledgements**

209 We thank Norman Lippmann (Medical Microbiology and Virology, University Hospital Leipzig) for writing the metadata  
210 queries our work relies on.





## 212 References

- 213 <sup>1</sup> Corl, K. A. *et al.* Delay in antibiotic administration is associated with mortality among septic shock patients with  
214 staphylococcus aureus bacteremia. *Crit. Care Med.* **48**, 525–532 (2020).
- 215 <sup>2</sup> Zhang, Y., Jiang, H., Ye, T. & Juhas, M. Deep learning for imaging and detection of microorganisms. *Trends*  
216 *Microbiol.* **29**, 569–572 (2021).
- 217 <sup>3</sup> Geirhos, R. *et al.* Comparing deep neural networks against humans: object recognition when the signal gets weaker  
218 (2017). 1706.06969.
- 219 <sup>4</sup> Esteva, A. *et al.* Dermatologist-level classification of skin cancer with deep neural networks. *Nature* **542**, 115–118  
220 (2017).
- 221 <sup>5</sup> Lundervold, A. S. & Lundervold, A. An overview of deep learning in medical imaging focusing on MRI. *Z. Med.*  
222 *Phys.* **29**, 102–127 (2019).
- 223 <sup>6</sup> Zieliński, B. *et al.* Deep learning approach to bacterial colony classification. *PLoS One* **12**, e0184554 (2017).
- 224 <sup>7</sup> Weis, C. V., Jutzeler, C. R. & Borgwardt, K. Machine learning for microbial identification and antimicrobial  
225 susceptibility testing on MALDI-TOF mass spectra: a systematic review. *Clin. Microbiol. Infect.* **26**, 1310–1317  
226 (2020).
- 227 <sup>8</sup> The CRyPTIC consortium & Lachapelle, A. S. A generalisable approach to drug susceptibility prediction for m.  
228 tuberculosis using machine learning and whole-genome sequencing (2021).
- 229 <sup>9</sup> The CRyPTIC Consortium, Earle, S. G. & Wilson, D. J. Genome-wide association studies of global mycobacterium  
230 tuberculosis resistance to thirteen antimicrobials in 10,228 genomes (2021).
- 231 <sup>10</sup> Kingma, D. P. & Welling, M. Auto-Encoding variational bayes (2013). 1312.6114v10.
- 232 <sup>11</sup> Ramesh, A. *et al.* Zero-Shot Text-to-Image generation (2021). 2102.12092.
- 233 <sup>12</sup> He, K., Zhang, X., Ren, S. & Sun, J. Deep residual learning for image recognition. In *2016 IEEE Conference on*  
234 *Computer Vision and Pattern Recognition (CVPR)*, 770–778 (2016).
- 235 <sup>13</sup> Jain, C., Rodriguez-R, L. M., Phillippy, A. M., Konstantinidis, K. T. & Aluru, S. High throughput ANI analysis of  
236 90K prokaryotic genomes reveals clear species boundaries. *Nat. Commun.* **9**, 5114 (2018).
- 237 <sup>14</sup> van Hal, S. J. *et al.* Predictors of mortality in staphylococcus aureus bacteremia. *Clin. Microbiol. Rev.* **25**, 362–386  
238 (2012).
- 239 <sup>15</sup> Lagacé-Wiens, P. R. S. *et al.* Identification of blood culture isolates directly from positive blood cultures by use of  
240 matrix-assisted laser desorption ionization-time of flight mass spectrometry and a commercial extraction system:  
241 analysis of performance, cost, and turnaround time. *J. Clin. Microbiol.* **50**, 3324–3328 (2012).
- 242 <sup>16</sup> van den Oord, A., Vinyals, O. & Kavukcuoglu, K. Neural discrete representation learning (2017). 1711.00937.
- 243 <sup>17</sup> Razavi, A., van den Oord, A. & Vinyals, O. Generating diverse High-Fidelity images with VQ-VAE-2 (2019).  
244 1906.00446.
- 245 <sup>18</sup> Simonyan, K. & Zisserman, A. Very deep convolutional networks for Large-Scale image recognition (2014).  
246 1409.1556.

- 
- 247 <sup>19</sup> von Chamier, L. *et al.* Democratising deep learning for microscopy with ZeroCostDL4Mic. *Nat. Commun.* **12**, 2276  
248 (2021).
- 249 <sup>20</sup> Krizhevsky, A., Sutskever, I. & Hinton, G. E. ImageNet classification with deep convolutional neural networks.  
250 In Pereira, F., Burges, C. J. C., Bottou, L. & Weinberger, K. Q. (eds.) *Advances in Neural Information Processing*  
251 *Systems 25*, 1097–1105 (Curran Associates, Inc., 2012).
- 252 <sup>21</sup> Kingma, D. P. & Ba, J. Adam: A method for stochastic optimization (2014). 1412.6980.
- 253 <sup>22</sup> Smith, L. N. A disciplined approach to neural network hyper-parameters: Part 1 – learning rate, batch size, momentum,  
254 and weight decay (2018). 1803.09820.

255 **Supplement**

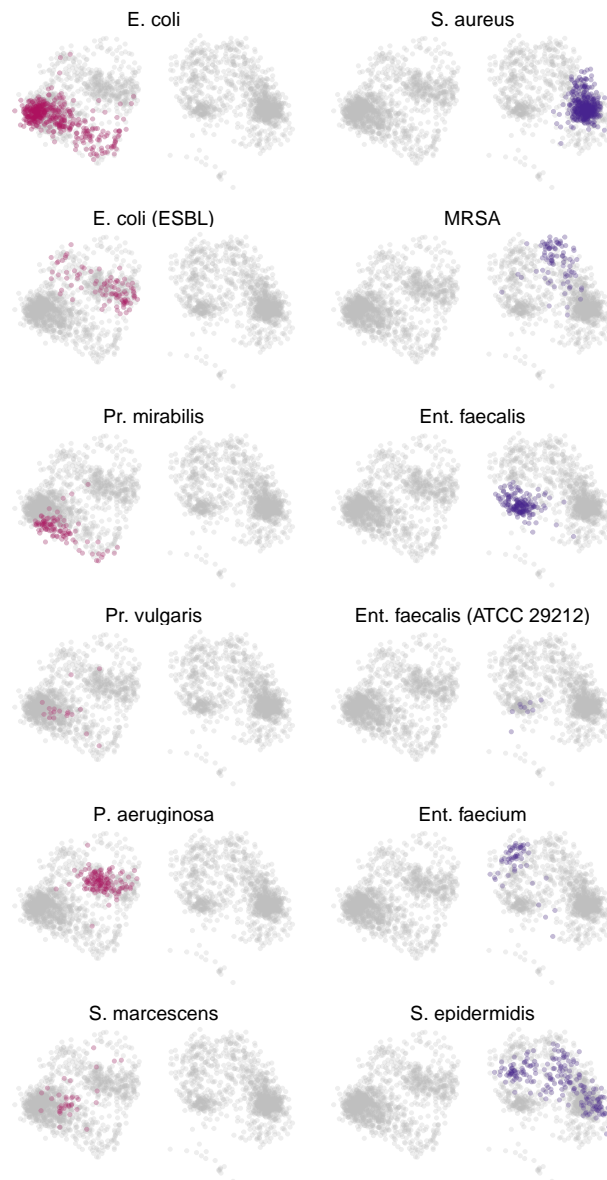

Figure S1: VAE latent space illustrated for additional bacteria.

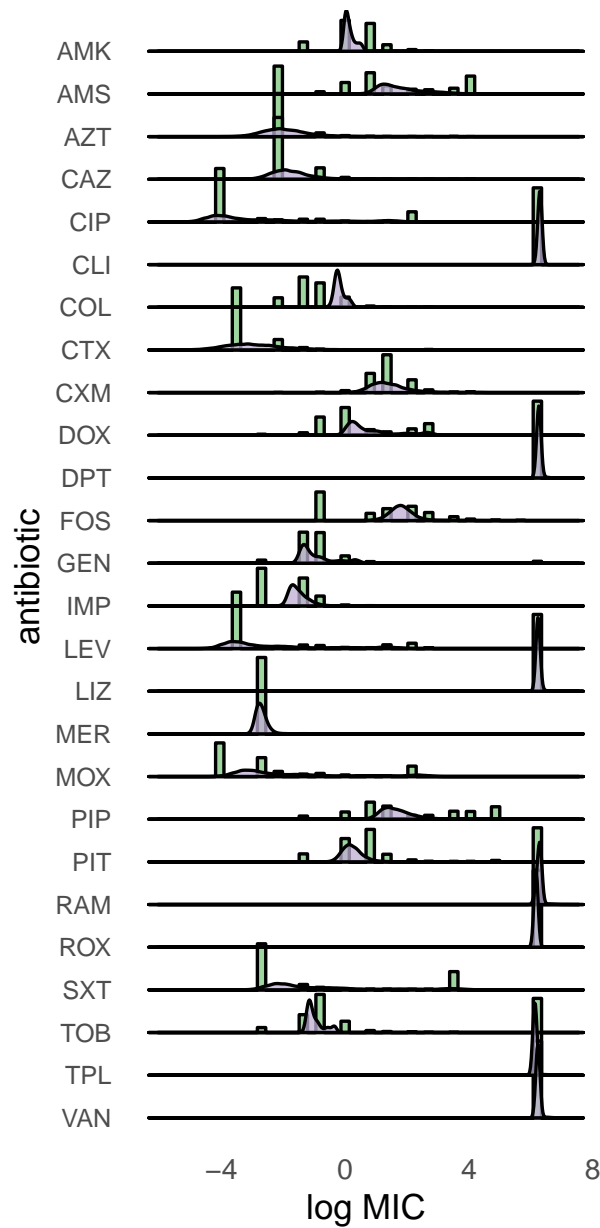

Figure S2: Distribution of MIC values (green histograms) and the distribution learned by the VAE (violet densities).

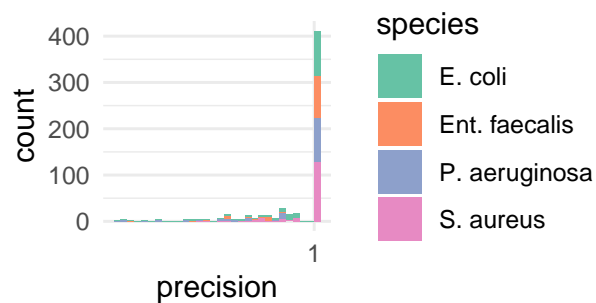

Figure S3: Precision histogram of EUCAST breakpoint class prediction.

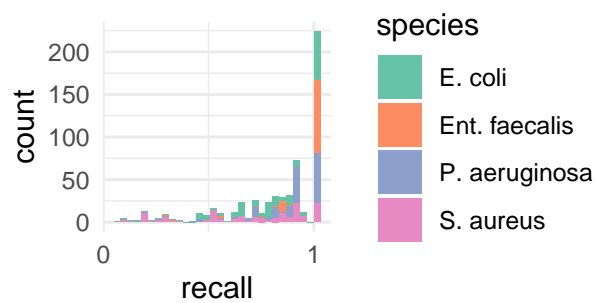

Figure S4: Recall histogram of EUCAST breakpoint class prediction.
